# Supplementary material for: Structure of the priming arabinosyltransferase AftA required for AG biosynthesis of Mycobacterium tuberculosis
Source: PubMed Central journal article supplement — Proc Natl Acad Sci U S A. 2023 May 30;120(23):e2302858120. doi: 10.1073/pnas.2302858120 (PMC10265970; doi:10.1073/pnas.2302858120), 2023-05-30
Supplement: pnas.2302858120.sapp.pdf [file pnas.2302858120.sapp.pdf]

## Supporting Information for

### Structure of the priming arabinosyltransferase AftA required for AG biosynthesis of *Mycobacterium tuberculosis*

Yicheng Gong<sup>a</sup>, Chuancun Wei<sup>a</sup>, Jun Wang<sup>a,b</sup>, Nengjiang Mu<sup>a</sup>, Qinhong Lu<sup>a</sup>, Chengyao Wu<sup>a</sup>, Ning Yan<sup>a</sup>, Huifang Yang<sup>a</sup>, Yao Zhao<sup>a</sup>, Xiuna Yang<sup>a</sup>, Sudagar S. Gurucha<sup>c</sup>, Natacha Veerapen<sup>c</sup>, Sarah M. Batt<sup>c</sup>, Zhiqiang Hao<sup>d</sup>, Lintai Da<sup>d</sup>, Gurdyal S. Besra<sup>c,1</sup>, Zihe Rao<sup>a,e</sup>, Lu Zhang<sup>a,1</sup>

<sup>a</sup> Shanghai Institute for Advanced Immunochemical Studies, School of Life Science and Technology, ShanghaiTech University, Shanghai 201210, China.

<sup>b</sup> School of Life Sciences, Tianjin University, Tianjin 300072, China.

<sup>c</sup> Institute of Microbiology and Infection, School of Biosciences, University of Birmingham, Edgbaston, Birmingham B15 2TT, UK.

<sup>d</sup> Key Laboratory of Systems Biomedicine (Ministry of Education), Shanghai Center for Systems Biomedicine, Shanghai Jiao Tong University, 800 Dongchuan Road, Shanghai 200240, China.

<sup>e</sup> Laboratory of Structural Biology, Tsinghua University, Beijing 100084, China.

<sup>1</sup>To whom correspondence may be addressed.

**Email:** g.besra@bham.ac.uk (G.S.B.) and zhanglu1@shanghaitech.edu.cn (L. Z.)

#### **This file includes:**

Figures S1-S10

Tables S1-S2

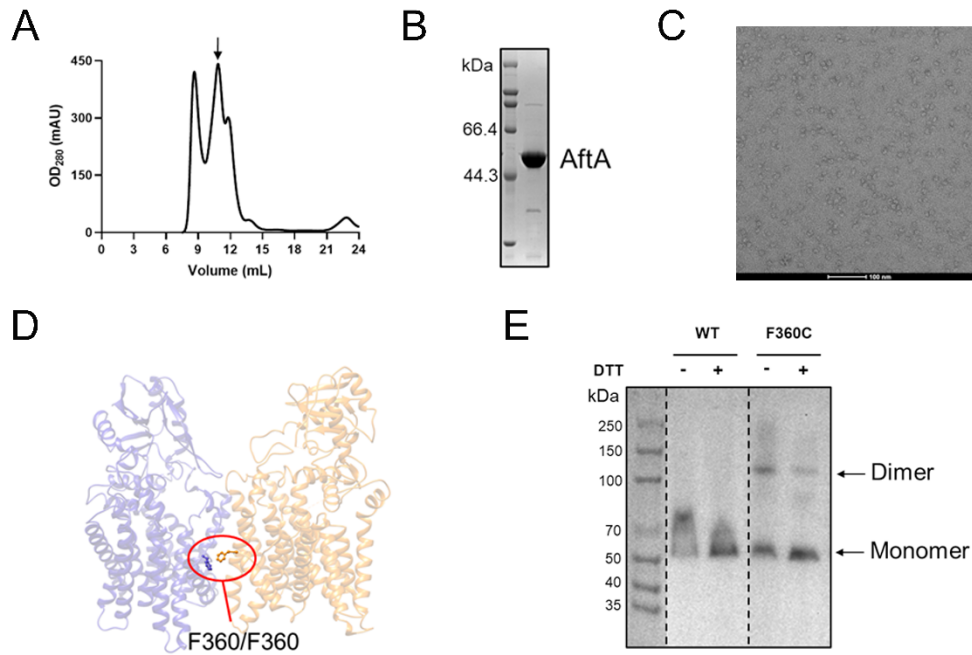

**Fig. S1. Characterization of *Mtb* AftA.**

(A) Size-exclusion chromatography on a Superdex 200 gel filtration column (GE healthcare) for *Mtb* AftA purified with detergent GDN.

(B) SDS-PAGE of the main peak fraction from size-exclusion chromatography corresponding to (A) as imaged by Coomassie Brilliant Blue. The band about 50 kDa corresponds to AftA protein used for EM study.

(C) Negative staining of AftA protein.

(D) Dimer interface with the a Phe360 pair chosen for cysteine mutation indicated with red circles.

(E) Western blot analysis of dimerization on cell membrane. Cell membranes containing 10×His-AftA, 10×His-AftA(F360C), were treated with and without 10 mM DTT. For F360C without DTT, the stronger monomeric AftA signal than the dimeric signal may be due to the dynamic equilibrium between monomeric and dimeric state, or the non-fully-oxidized environment of the membrane where F360C was embedded.

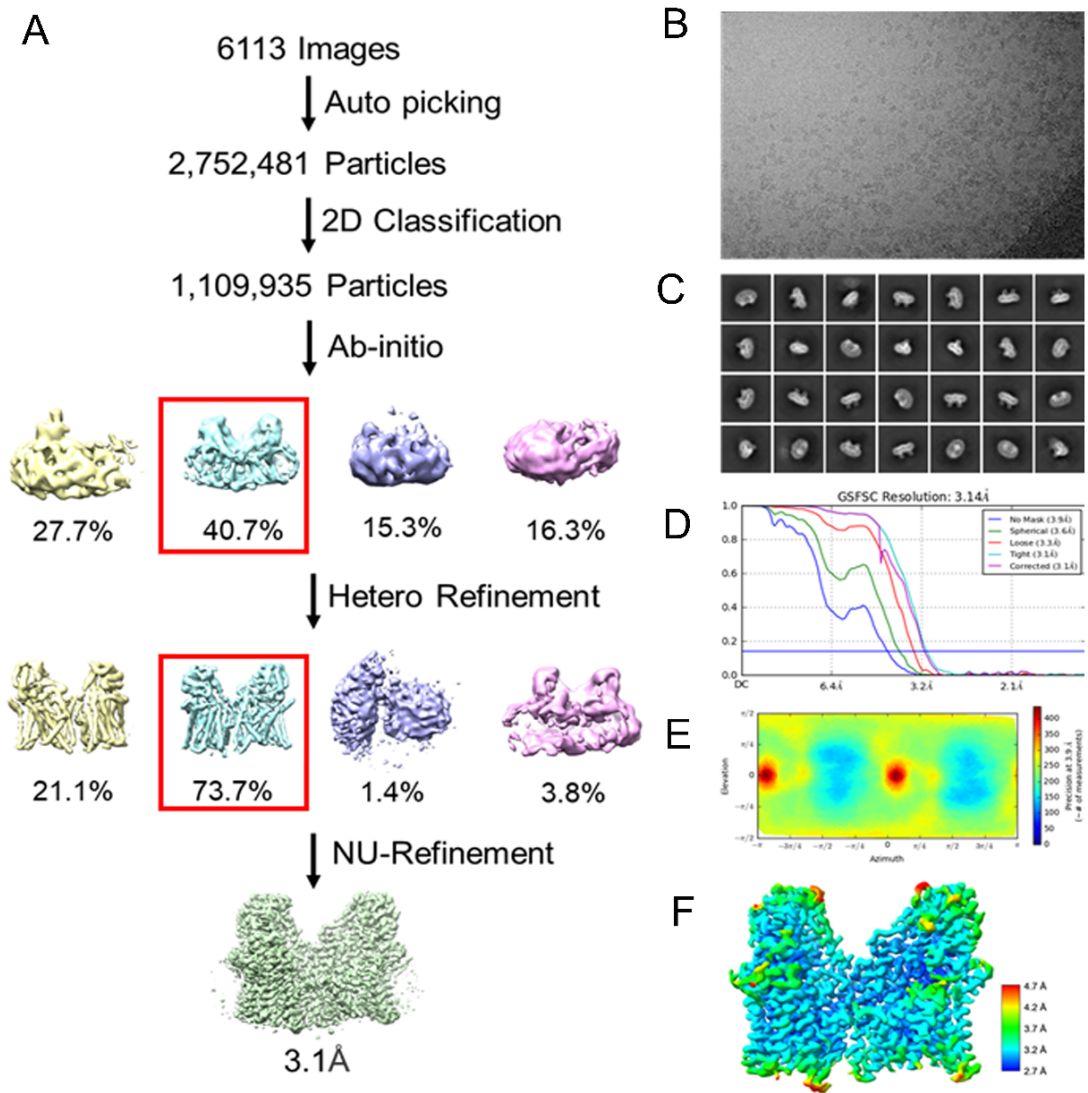

**Fig. S2. Cryo-EM data processing and validation of *Mtb* AftA.**

(A) Flow chart for the processing of cryo-EM data. The density observed around the TM region of the final model is the signal of detergent that wraps around the membrane protein.

(B) Representative electron micrograph.

(C) Selected reference-free 2D class averages.

(D) Gold-standard fourier correlation curves of 3D reconstructions.

(E) Posterior precision directional distributions of all particles used in the final 3D reconstruction reported by cryoSPARC.

(F) The density map colored according to the local resolution estimation using cryoSPARC.

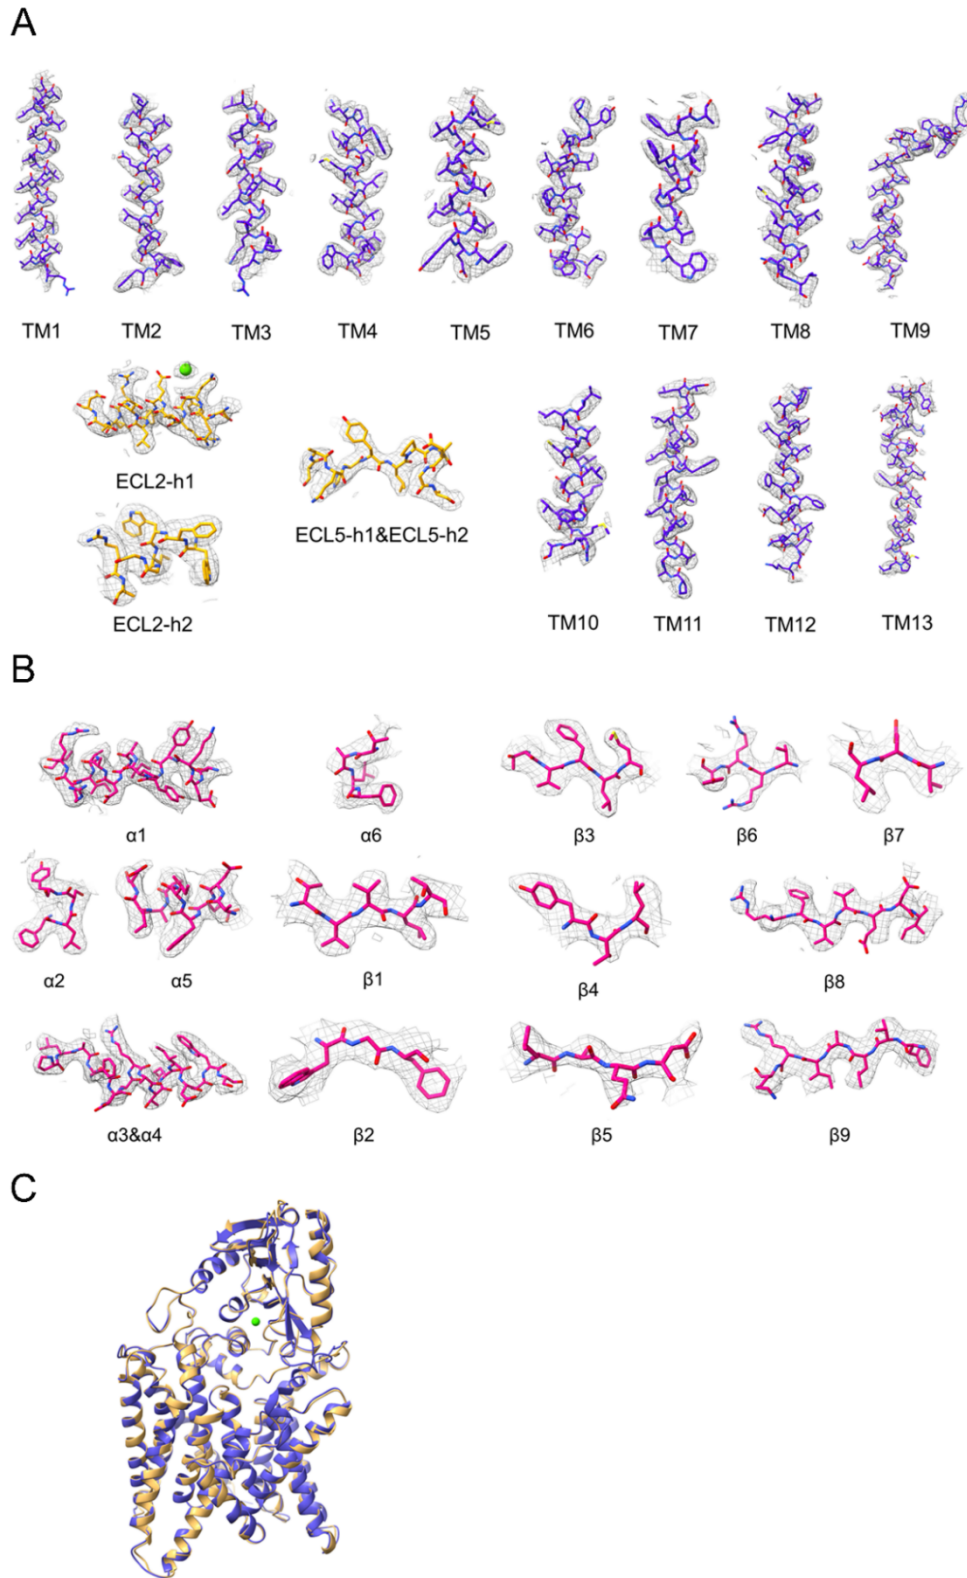

Fig. S3. Example regions of cryo-EM maps of AftA.

(A) The cryo-EM map (threshold 0.28) of TM1-13 and ECL2&ECL5.

(B) The cryo-EM map (threshold 0.28) of CTD including  $\alpha$ 1-6 and  $\beta$ 1-9.

(C) Alignment of the two AftA protomers.

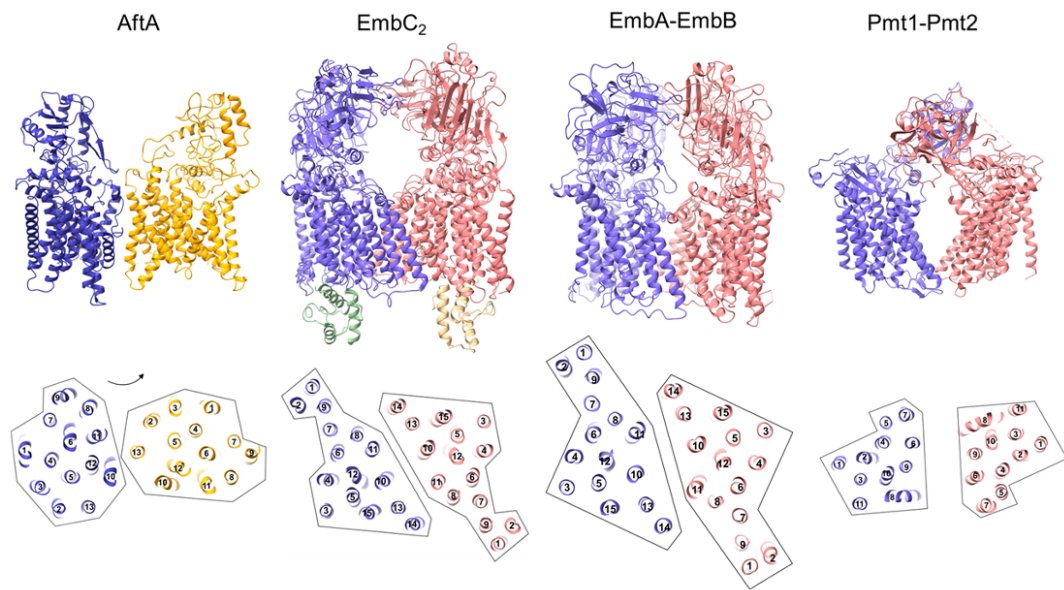

**Fig. S4. Comparison of dimer assembly pattern of AftA with other GT-C enzymes.** (up) Cartoon representations of AftA, Pmt1-Pmt2 (PDB code 6P25), EmbA-EmbB (PDB code 7BVF), EmbC-EmbC (PDB code 7BVE). Each structure is colored by chain; (down) Arrangement of the TM helices for the structures is shown as a slice through the TM domain. Two AftA monomers show an asymmetric rotation while other dimers are arranged in a two-fold (EmbC<sub>2</sub>) or a pseudo-two-fold (EmbA-EmbB, Pmt1-Pmt2) symmetry.

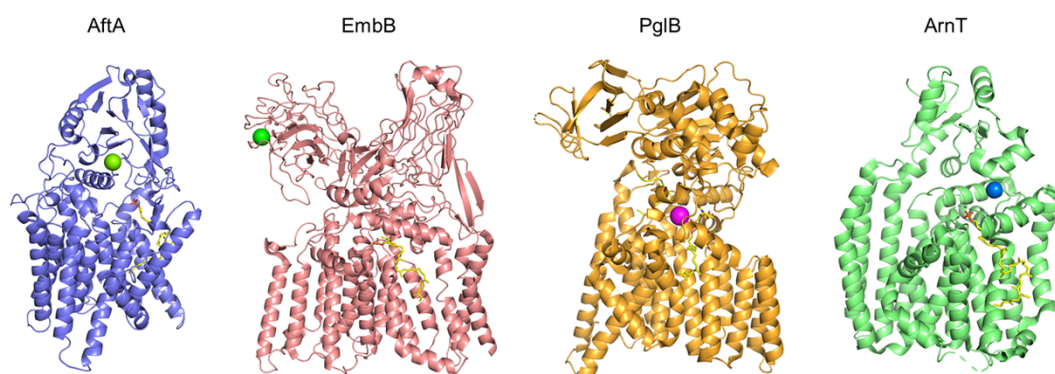

**Fig. S5. the metal ion binding mode in AftA is different from three representative GT-C enzymes.**

Cartoon representations of AftA, EmbB(PDB code 7BVF), PglB(PDB code 5OGL), ArnT (PDB code 5F15).  $\text{Ca}^{2+}$ ,  $\text{Mn}^{2+}$  and  $\text{Zn}^{2+}$  are represented by green, magenta and blue spheres.

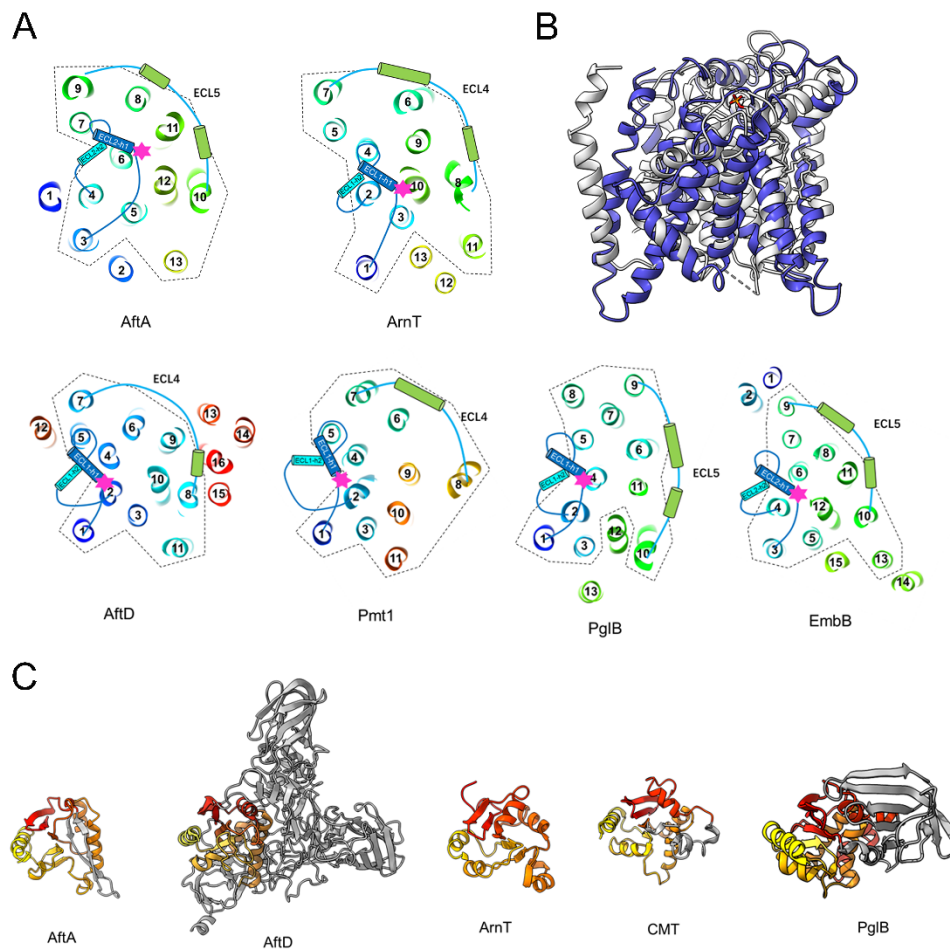

**Fig. S6. Conservation of the GT-C core in both TMD and CTD.**

(A) Arrangement of the TM helices for the structures is shown as a slice through the TM domain. 11 TM helices inside the dashed circles have a common arrangement. From left to right are AftA, ArnT(PDB code 5F15), AftD(PDB code 6W98), Pmt1(PDB code 6P25), PglB(PDB code 5OGL), EmbB(PDB code 7BVF). The catalytically essential Asp is shown as a magenta asterisk at the beginning of ECL1(2 in AftA and EmbB)-h1.

(B) Superimpose the TMD core (TM3-13) of AftA on the TMD core (TM1-11) of ArnT which has a donor UndP around its GT-C core, the phospholipid moiety of the sugar donor lies within the proposed donor cavity. AftA is shown as blue ribbon, while ArnT is gray.

(C) Structures of the luminal dome of representative GT-C members are aligned to the CTD of AftA. The structurally conserved core is highlighted in red, orange and yellow. From left to right are AftA, AftD(PDB code 6W98), ArnT(PDB code 5F15), CMT(PDB code 7ZLH), PglB(PDB code 5OGL).





M.tub 280 AFTVFLMALLLGSRL.QSGIKA.AVDPICRIAVVCAIAAAGSTWLPFLRAARDPVS  
M.smg 257 AFTVFLMALLLGSRL.QSGIKA.AVDPICRIAVVCAIAAAGSTWLPFLRAARDPVS  
M.abs 257 AFTVFLMALLLGSRL.QSGIKA.AVDPICRIAVVCAIAAAGSTWLPFLRAARDPVS  
M.bov 280 AFTVFLMALLLGSRL.QSGIKA.AVDPICRIAVVCAIAAAGSTWLPFLRAARDPVS  
M.lep 268 AFTVFLMALLLGSRL.QSGIKA.AVDPICRIAVVCAIAAAGSTWLPFLRAARDPVS  
M.mar 286 AFTVFLMALLLGSRL.QSGIKA.AVDPICRIAVVCAIAAAGSTWLPFLRAARDPVS  
M.avi 317 AFTVFLMALLLGSRL.QSGIKA.AVDPICRIAVVCAIAAAGSTWLPFLRAARDPVS  
M.for 271 AFTVFLMALLLGSRL.QSGIKA.AVDPICRIAVVCAIAAAGSTWLPFLRAARDPVS  
C.glu 292 AFTVFLMALLLGSRL.QSGIKA.AVDPICRIAVVCAIAAAGSTWLPFLRAARDPVS  
C.dip 291 AFTVFLMALLLGSRL.QSGIKA.AVDPICRIAVVCAIAAAGSTWLPFLRAARDPVS

M.tub 338 DTGSAHQHLPADGALTFPMLQFSLGALCMICLWLVYRARTSTRAGALAVAVLYYW  
M.smg 309 DTGSAHQHLPADGALTFPMLQFSLGALCMICLWLVYRARTSTRAGALAVAVLYYW  
M.abs 327 KAASAQHLDPADGALTFPMLQFSLGALCMICLWLVYRARTSTRAGALAVAVLYYW  
M.bov 338 DTGSAHQHLPADGALTFPMLQFSLGALCMICLWLVYRARTSTRAGALAVAVLYYW  
M.lep 327 DTGSAHQHLPADGALTFPMLQFSLGALCMICLWLVYRARTSTRAGALAVAVLYYW  
M.mar 345 DTGSAHQHLPADGALTFPMLQFSLGALCMICLWLVYRARTSTRAGALAVAVLYYW  
M.avi 376 DTGSAHQHLPADGALTFPMLQFSLGALCMICLWLVYRARTSTRAGALAVAVLYYW  
M.for 323 EKCTAHLDPADGALTFPMLQFSLGALCMICLWLVYRARTSTRAGALAVAVLYYW  
M.mar 345 SGTSAHQHLPADGALTFPMLQFSLGALCMICLWLVYRARTSTRAGALAVAVLYYW  
C.glu 344 GTAAAHQLDPADGALTFPMLQFSLGALCMICLWLVYRARTSTRAGALAVAVLYYW  
C.dip 344 GTAAAHQLDPADGALTFPMLQFSLGALCMICLWLVYRARTSTRAGALAVAVLYYW

M.tub 398 SLISMIITLARTTLLFRLOPTLVLVLAGAFGEVLAVALCKRG.....RGV  
M.smg 369 SLISMIITLARTTLLFRLOPTLVLVLAGAFGEVLAVALCKRG.....RGV  
M.abs 387 SLISMIITLARTTLLFRLOPTLVLVLAGAFGEVLAVALCKRG.....RGV  
M.bov 398 SLISMIITLARTTLLFRLOPTLVLVLAGAFGEVLAVALCKRG.....RGV  
M.lep 387 SLISMIITLARTTLLFRLOPTLVLVLAGAFGEVLAVALCKRG.....RGV  
M.mar 405 SLISMIITLARTTLLFRLOPTLVLVLAGAFGEVLAVALCKRG.....RGV  
M.avi 436 SLISMIITLARTTLLFRLOPTLVLVLAGAFGEVLAVALCKRG.....RGV  
M.for 383 SLISMIITLARTTLLFRLOPTLVLVLAGAFGEVLAVALCKRG.....RGV  
M.mar 404 MNSMAITLGNLTLFRLOPTLVLVLAGAFGEVLAVALCKRG.....RGV  
C.glu 404 MNSMAITLGNLTLFRLOPTLVLVLAGAFGEVLAVALCKRG.....RGV  
C.dip 403 VLSMSVITLGNLTLFRLOPTLVLVLAGAFGEVLAVALCKRG.....RGV

+

M.tub 448 PMAAATGLAGATAFSODIPDVLRPDLTIAYTDTGGGCRDRRPPGSEKRYPAIDAAIRR  
M.smg 424 AAATAVGAI GAVTFSODIPDVLRPDLTIAYTDTGGGCRDRRPPGSEKRYPAIDAAIRR  
M.abs 437 LVATATGLAGATAFSODIPDVLRSDIVIAYTDTGGGCRDRRPPGSEKRYPAIDAAIRR  
M.bov 448 PMAAATGLAGATAFSODIPDVLRPDLTIAYTDTGGGCRDRRPPGSEKRYPAIDAAIRR  
M.lep 437 SVASAIGLAGATAFSODIPDVLRSDIVIAYTDTGGGCRDRRPPGSEKRYPAIDAAIRR  
M.mar 455 PVAATGLAGATAFSODIPDVLRPDLTIAYTDTGGGCRDRRPPGSEKRYPAIDAAIRR  
M.avi 486 PVAATGLAGATAFSODIPDVLRPDLTIAYTDTGGGCRDRRPPGSEKRYPAIDAAIRR  
M.for 438 AAAAATGLAGATAFSODIPDVLRSDIVIAYTDTGGGCRDRRPPGSEKRYPAIDAAIRR  
C.glu 464 NLIVVVLVLLGLVYACDIPDRNARAIIDAYTDTGGGCRDRRPPGSEKRYPAIDAAIRR  
C.dip 463 VIGVVLVLLGLVYACDIPDRNARAIIDAYTDTGGGCRDRRPPGSEKRYPAIDAAIRR

M.tub 508 VTCRRDRVVVADYSPFSYYPYVCGGLTGHYANPLAQPDRRAAID.....GWSGLS  
M.smg 484 VTCRRDRVVVADYSPFSYYPYVCGGLTGHYANPLAQPDRRAAID.....GWSGLS  
M.abs 497 VTCRRDRVVVADYSPFSYYPYVCGGLTGHYANPLAQPDRRAAID.....GWSGLS  
M.bov 508 VTCRRDRVVVADYSPFSYYPYVCGGLTGHYANPLAQPDRRAAID.....GWSGLS  
M.lep 497 VTCRRDRVVVADYSPFSYYPYVCGGLTGHYANPLAQPDRRAAID.....GWSGLS  
M.mar 515 VTCRRDRVVVADYSPFSYYPYVCGGLTGHYANPLAQPDRRAAID.....GWSGLS  
M.avi 546 VTCRRDRVVVADYSPFSYYPYVCGGLTGHYANPLAQPDRRAAID.....GWSGLS  
M.for 498 VTCRRDRVVVADYSPFSYYPYVCGGLTGHYANPLAQPDRRAAID.....GWSGLS  
C.glu 524 VTCRRDRVVVADYSPFSYYPYVCGGLTGHYANPLAQPDRRAAID.....GWSGLS  
C.dip 523 VTCRRDRVVVADYSPFSYYPYVCGGLTGHYANPLAQPDRRAAID.....GWSGLS

M.tub 563 TADEFLAALDKLPWQPIVFLMRRHGA.....HNSYTLRLAADVYPNQENVRRYIVDRLT  
M.smg 539 SADDVFAALDELDPWQPIVFLMRRHGA.....NDTYTLRLAADVYPNQENVRRYIVDRLT  
M.abs 563 TADEFLAALDKLPWQPIVFLMRRHGA.....HNSYTLRLAADVYPNQENVRRYIVDRLT  
M.bov 563 TADEFLAALDKLPWQPIVFLMRRHGA.....HNSYTLRLAADVYPNQENVRRYIVDRLT  
M.lep 552 TADEFLAALDKLPWQPIVFLMRRHGA.....GNTYTLRLAADVYPNQENVRRYIVDRLT  
M.mar 570 TSDEFLVQALDKLPWQPIVFLMRRHGA.....PGSGASYTLRLAADVYPNQENVRRYIVDRLT  
M.avi 601 TADEFLAALDKLPWQPIVFLMRRHGA.....NDTYTLRLAADVYPNQENVRRYIVDRLT  
M.for 553 KADDFVQALDELDPWQPIVFLMRRHGA.....NDTYTLRLAADVYPNQENVRRYIVDRLT  
C.glu 583 DPQDFRAVSNVDPWQPIVFLMRRHGA.....DDPDAGKRYDYADVYPNQENVRRYIVDRLT  
C.dip 583 DPQDFRAVSNVDPWQPIVFLMRRHGA.....TGSSDSKPKGNFNLAIDVFNENVRRYIVDRLT

|        |     |       |            |      |         |           |            |
|--------|-----|-------|------------|------|---------|-----------|------------|
| M. tub | 617 | ALP▲D | ..PRFVVE   | DT   | CPFV    | LAIRKP    | QESA.....  |
| M. smg | 593 | AVPDD | ..PRFEVSDH | CPFV | LAIRKP  | GGKPEIDGH |            |
| M. abs | 605 | QLP▲D | ..PRFTVRI  | CPFV | LVVRVP  | PFA.....  |            |
| M. bov | 617 | ALP▲D | ..PRFVVE   | DT   | CPFV    | LAIRKP    | QESA.....  |
| M. lep | 606 | ALP▲D | ..QRFVQDI  | CPFV | LAIRKP  | MGNA..... |            |
| M. mar | 628 | ALP▲D | ..PRFVETI  | CPFV | LAIRKPA | SA.....   |            |
| M. avi | 655 | ALPDS | ..PRFAVHV  | CPFV | LAVRKPA | .....     |            |
| M. for | 607 | ALP▲D | ..PRFEVTDI | CPFV | LAIRKPT | SDGH..... |            |
| C. glu | 640 | ESFD  | ..QMWQTR   | QV   | GFVVT   | HNE.....  |            |
| C. dip | 643 | EVE   | QSEN       | SEWT | VTQV    | CPFV      | VVTHD..... |

**Fig. S7. Sequence alignment of AftA within the Corynebacterianae.**

Sequence alignment of AftA from *Mycobacterium tuberculosis*, *Mycobacterium smegmatis*, *Mycobacteroides abscessus*, *Mycobacterium bovis*, *Mycobacterium leprae*, *Mycobacterium marinum*, *Mycobacterium avium*, *Mycolicibacterium fortuitum*, *Corynebacterium glutamicum* and *Corynebacterium diphtheriae*. Catalytic site Asp and conserved amino acids mentioned in the article are highlight as ▲ and ✦.

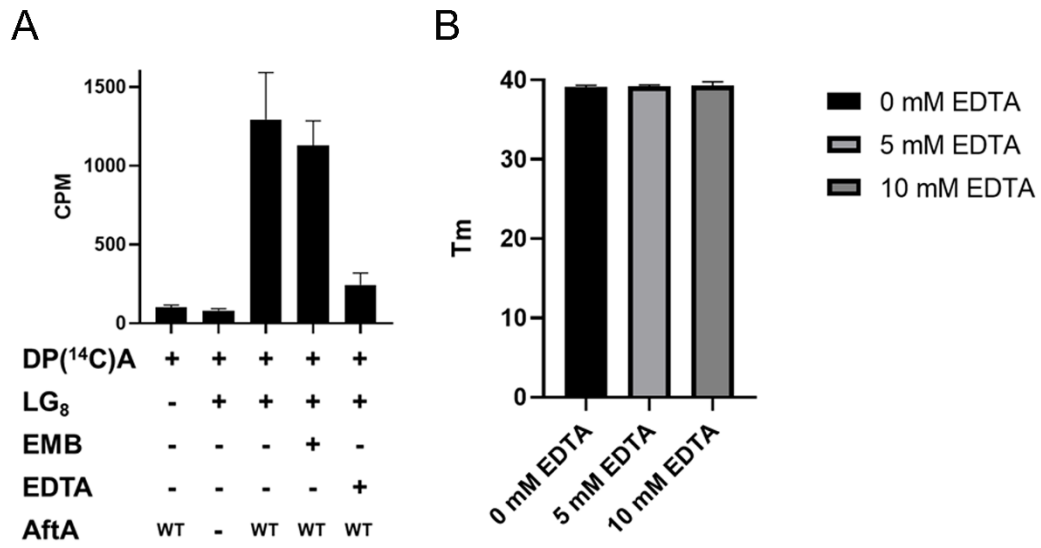

**Fig. S8. Effect of EDTA and ethambutol on the activity and thermostability of AftA.**

(A) Enzymatic activity of WT *Mtb* AftA when adding EDTA and ethambutol.

(B) Thermostability of AftA protein in EDTA at different concentrations.

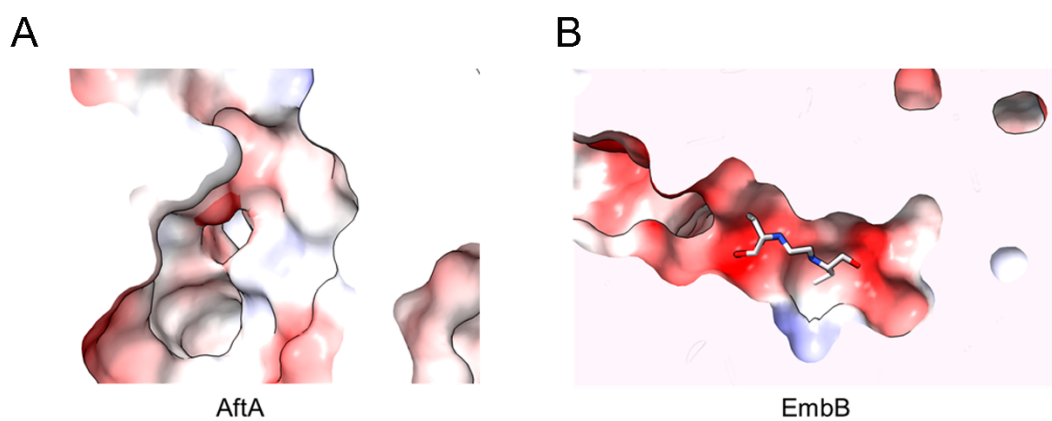

**Fig. S9. Comparison of active sites of *Mtb* AftA and *Mtb* EmbB.**

(A) Section of AftA active site, shown as electrostatic surface.

(B) Section of EmbB active site bound with ethambutol, shown as electrostatic surface.

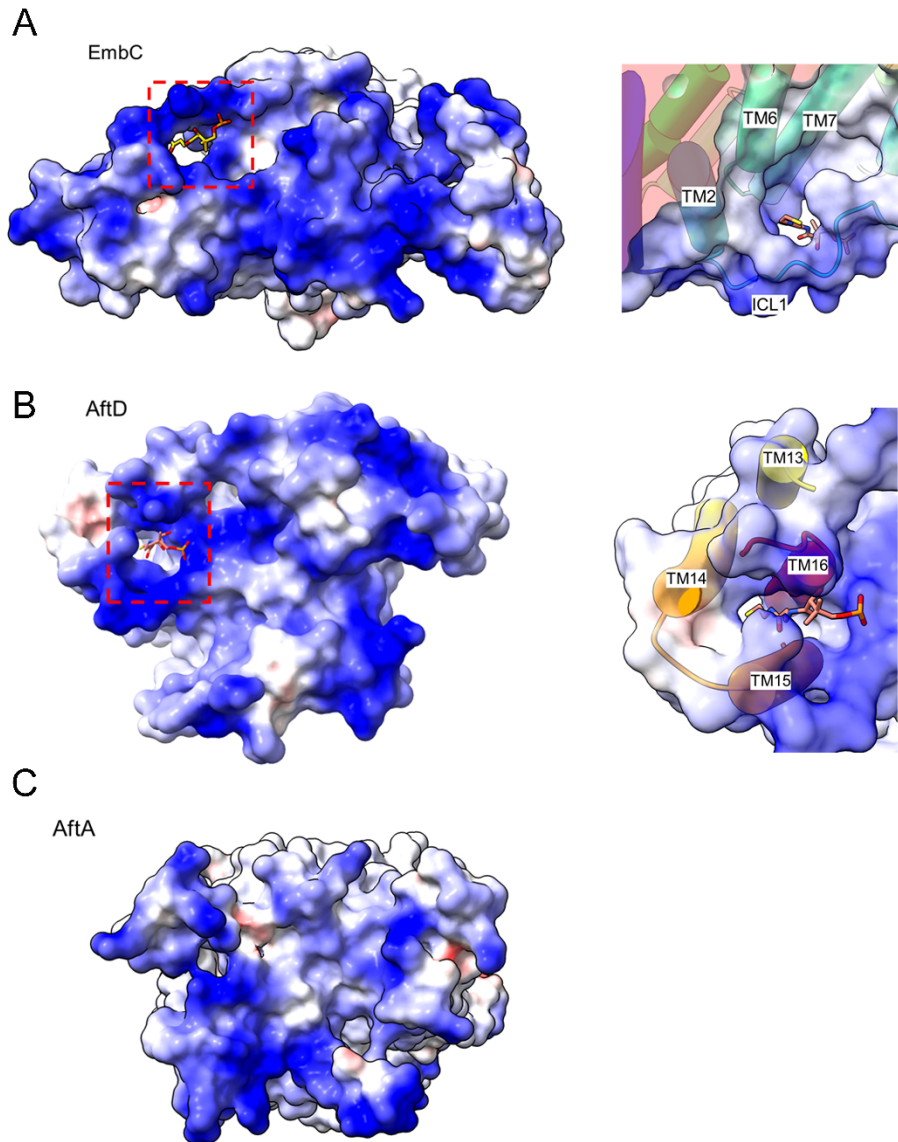

**Fig. S10. AcpM binding sites.**

- (A) Left, cytoplasmic surface of EmbC, shown as electrostatic surface. Right, the 4'-Ppant binding tunnel formed by TM2, TM6, TM7 and ICL1 of EmbC.
- (B) Left, cytoplasmic surface of AftD, shown as electrostatic surface. Right, the 4'-Ppant binding tunnel formed by TM13-16 of AftD.
- (C) Cytoplasmic surface of AftA, shown as electrostatic surface.

**Table S1. Cryo-EM data collection and modeling statistics.**

| <b>AftA apo</b>                                          |                  |
|----------------------------------------------------------|------------------|
| EMDB: 35410                                              |                  |
| PDB ID: 8IF8                                             |                  |
| <b>Cryo-electron microscopy data collection</b>          |                  |
| Microscope                                               | FEI Titan Krios  |
| Voltage (keV)                                            | 300              |
| Camera                                                   | Gatan K3-Summit  |
| Automation software                                      | SerialEM         |
| Normal / Calibrated magnification                        | 105,000 / 59,000 |
| Exposure rate (e <sup>-</sup> / (pixel <sup>2</sup> ·s)) | 16.8             |
| Total dose (e <sup>-</sup> /Å <sup>2</sup> )             | 60               |
| Exposure time (s)                                        | 2.4              |
| Number of frames collected                               | 40               |
| Defocus range (μm)                                       | 1.2-2.0          |
| Pixel size (Å/pixel)                                     | 0.832            |
| <b>3D reconstruction</b>                                 |                  |
| Number of movies                                         | 6113             |
| Symmetry imposed                                         | C1               |
| Initial Particle Number                                  | 2,752,481        |
| Final particle images (No.)                              | 147,896          |
| Resolution (unmasked, Å)                                 | 3.9              |
| Resolution (masked, Å)                                   | 3.14             |
| Sharpening B-factor (Å <sup>2</sup> )                    | -103.9           |
| Local resolution range (Å)                               | 2.7-4.7          |
| <b>Coordinate and B-factor refinement</b>                |                  |
| <b>Model composition</b>                                 |                  |
| Atoms (non-H)                                            | 9307             |
| Protein residues                                         | 1218             |
| Ligands                                                  | 2                |
| Mean B-factor protein atoms (Å <sup>2</sup> )            | 54.31            |
| Mean B-factor Ligand atoms (Å <sup>2</sup> )             | 56.81            |
| Rmsd bonds (Å)                                           | 0.006            |
| Rmsd bond angles (°)                                     | 0.745            |
| <b>Model-to-map scores</b>                               |                  |
| CC (mask)                                                | 0.88             |
| CC (volume)                                              | 0.85             |
| CC (box)                                                 | 0.70             |
| Mean CC for ligands                                      | 0.82             |

| <b>Validation</b>        |       |
|--------------------------|-------|
| MolProbity score         | 1.85  |
| Clash score              | 6.79  |
| Rotamer outliers (%)     | 0     |
| C $\beta$ outliers (%)   | 0     |
| CaBLAM outliers (%)      | 3.58  |
| <b>Ramachandran plot</b> |       |
| Favored (%)              | 92.23 |
| Allowed (%)              | 7.69  |
| Outliers (%)             | 0.08  |

**Table S2. Summary of model building**

| <b>Protopmer Name</b> | <b>Chain</b> | <b>Total residues/<br/>Range built</b> | <b>Unmodelled residues</b> | <b>% atomic model</b> | <b>Ligands</b>   |
|-----------------------|--------------|----------------------------------------|----------------------------|-----------------------|------------------|
| AftA Protomer 1       | B            | 643/<br>20-639                         | 1-19, 640-643              | 96.4%                 | Ca <sup>2+</sup> |
| AftA Protomer 2       | C            | 643/<br>21-339, 351-<br>598, 609-639   | 1-20, 340-350,<br>599-608  | 93.0%                 | Ca <sup>2+</sup> |
